# Supplementary material for: Identification of an Evolutionarily Conserved Ankyrin Domain-Containing Protein, Caiap, Which Regulates Inflammasome-Dependent Resistance to Bacterial Infection
Source: PubMed Central journal article supplement (PMC5662874; doi:10.3389/fimmu.2017.01375), 2017-10-19
Supplement: image_1.pdf [file image_1.pdf]

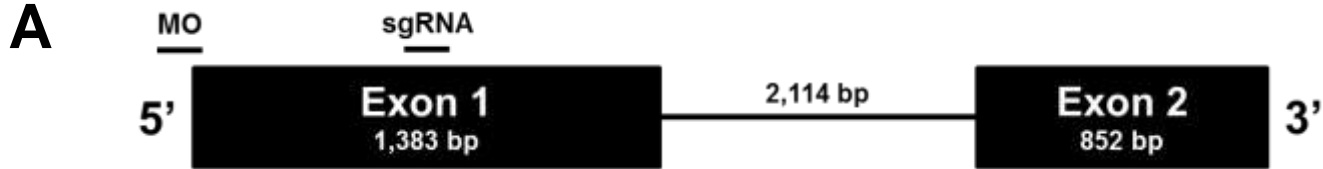

**B**

|                           |                         |                          |             |               |                 |                                    |                             |                  |                     |                   |                  |                 |                      |                 |          |     |           |         |   |     |      |     |     |      |    |      |     |
|---------------------------|-------------------------|--------------------------|-------------|---------------|-----------------|------------------------------------|-----------------------------|------------------|---------------------|-------------------|------------------|-----------------|----------------------|-----------------|----------|-----|-----------|---------|---|-----|------|-----|-----|------|----|------|-----|
| Tasmanian devil           | -----MCSSTHGQSSPYA      | TEVMKMKKGELAAGIKDSDGLIQR | LDVYGIFTAEO | KL            | SLSYKTNPEK      | VTRVLDMLISQGEHACRMFFYP             | CLKQLEPDLYH                 | VI               | IRK                 | YTMGT             | EEVIPGAE         | 111             |                      |                 |          |     |           |         |   |     |      |     |     |      |    |      |     |
| Gray short-tailed opossum | -----MCSSTPGRNSPYA      | IQVMKMKKEELAAGIKDADLLKRL | VDYGI       | FTSE          | O               | KLALSHYETHLEKVNRLDILISQGEHACOVFFYP | CLKQLEPNLYQI                | IR               | K                   | YTMGT             | DEIMYRTR         | 111             |                      |                 |          |     |           |         |   |     |      |     |     |      |    |      |     |
| Large yellow croaker      | MF-NLLKGFDAQATPNHINPYA  | VDVIRAKKMDLVHGISHTE      | DL          | LDHLVTEGVM    | TAAKSI          | VLTIRTRQDQNSRVLDILEARGERACR        | FFHPCLMLAE                  | P                | K                   | LYQEIKTYL         | SDVNGHIRDTR      | 119             |                      |                 |          |     |           |         |   |     |      |     |     |      |    |      |     |
| Nile tilapia              | MW-NKVKGFESHAASNSKNPYA  | VDVIRTKRRDLVYGISHTEDLL   | N           | LVAEGVMTTAKRS | IVLS            | IRTHKDQNSRVLDILEARGERACR           | FFHPCLMLAE                  | P                | E                   | LYQRIKTYV         | GGMNEHVQDNR      | 119             |                      |                 |          |     |           |         |   |     |      |     |     |      |    |      |     |
| Burton's mouthbrooder     | MW-NNVKGFEASHAASNSKNPYA | VDVIRTKRRDLVYGISHTEDLL   | N           | LVAEGVMTTARRS | IVLS            | IRTHKDQNSRVLDILEARGERACR           | FFHPCLMLAE                  | P                | E                   | LYQRIKTYV         | RSMQVQDNR        | 119             |                      |                 |          |     |           |         |   |     |      |     |     |      |    |      |     |
| Elephant shark            | -----MVLHMPTGIPTNPYA    | IEVLQRKKSELVAGIANTD      | H           | LLDWLIENGLV   | SADKRLAVSS      | YRTREEKNARLLEMLVSRGERACR           | FFYPCLKRV                   | E                | P                   | ALYNQIRSYV        | SEVSGSFGDAR      | 113             |                      |                 |          |     |           |         |   |     |      |     |     |      |    |      |     |
| Atlantic herring          | -----MSSTKTTVNPYA       | VEVIKTKKEELVGGILNTE      | E           | LLDLLVDHGI    | I               | SHDQRLVSSIQ                        | TQ                          | E                | E                   | RNSKLLDVLSRGERACR | IFFYPCLKRAEPDLYQ | NMRYV           | AGSVNEDIRDAR         | 110             |          |     |           |         |   |     |      |     |     |      |    |      |     |
| Zebrafish                 | -----MGSTSFNPYA         | IEVIQMKRSELVSGILNPE      | D           | LLDLLIANGV    | L               | QDPIRVLVSDLTVREKNSR                | MLNILSRGERACR               | IFFYPCLKRAEPDLYQ | H                   | MRTYV             | GGVNEGIRDAR      | 109             |                      |                 |          |     |           |         |   |     |      |     |     |      |    |      |     |
| Blind cave fish           | -----MGSTKFTNPYA        | LEVIRTKKEELVGGISNT       | E           | DL            | LLVANGVLLPES    | RVLVSCIAARDEKNSR                   | MLSLVSRGERACR               | IFFYPCLKSAEPDLYQ | S                   | MKTYV             | SLNQNIKDTR       | 109             |                      |                 |          |     |           |         |   |     |      |     |     |      |    |      |     |
| African coelacanth        | -----MSSRSLFINPYA       | IEVLKTKKQELIEGINS        | T           | D             | LLDWLDNAILTPDKK | V                                  | LVSNYRTREEKNSR              | VLDLILSRGERACR   | FFYPCLKHVEPE        | L                 | YNNIRKYASSIN     | VSVGDVR         | 110                  |                 |          |     |           |         |   |     |      |     |     |      |    |      |     |
| Western clawed frog       | MSTPATQLPAISSTSLFTNPYA  | IEVLKMKKQELVEGIKDP       | T           | LLQSLIDNG     | I               | M                                  | LSDKKMVLSYKTKTEKNSRLIDLIL   | STGERACR         | FFHPCLKQVEP         | S                 | LYNSVKNYV        | STVND           | SVGDGR               | 120             |          |     |           |         |   |     |      |     |     |      |    |      |     |
| American chameleon        | -----MGSSIYTNPYA        | IEVLKMKKNELVEGIN         | N           | PDHLLDCLIEYGI | F               | T                                  | PEKKLVLSYRTRRAKNSR          | VLDILASQGERACR   | FFYPCLKEIEP         | Y                 | LYSQIRNYV        | SDVNVKIGDAR     | 109                  |                 |          |     |           |         |   |     |      |     |     |      |    |      |     |
| King cobra                | -----MYSLSLFTNPYA       | IEVLKMKKNELVEGIK         | N           | PDHLLDRLIEK   | G               | ALTTEK                             | KMLSYYRTRMAKNSR             | VLDILASQGERACR   | FFYPCLKEVEP         | R                 | LYSKIRNYV        | SDVNEKIGDAR     | 109                  |                 |          |     |           |         |   |     |      |     |     |      |    |      |     |
| Common garter snake       | -----MYSNLFTNPYA        | IEVLKMKKNELVEGIK         | N           | PDHLLDCLIEKS  | I               | LSPEKKM                            | VLSYRTRMAKNSCILDILASQGERACR | FFYPCLKEVEP      | R                   | LYSNIRNYV         | SNVNETVGDAR      | 109             |                      |                 |          |     |           |         |   |     |      |     |     |      |    |      |     |
| Chinese alligator         | -----MHSTSLFTNPYA       | IEVLQTKKEELVEGIN         | N           | PDHLLNWLITNGI | F               | T                                  | PEKKMVMSYRTRIEKNSR          | VLDILV           | SQGERACR            | FFYPCLKQVEP       | N                | LYNSVRRYV       | SDINESIGDAR          | 110             |          |     |           |         |   |     |      |     |     |      |    |      |     |
| Western painted turtle    | -----MYLNSLFTNPYA       | IEVLKTKKEELVEGLN         | N           | PDHLLNWLIDNGI | F               | T                                  | PEKKMVMSYRTRRAKNSR          | VLDILV           | SQGERACR            | FFYPCLKQVEP       | N                | LYNR            | IKKYVSDVNESIGDAR     | 110             |          |     |           |         |   |     |      |     |     |      |    |      |     |
| Green sea-turtle          | -----MYLNNLFTNPYA       | IEVLKTKKEELVEGIK         | N           | PDHLLNWMIDNGI | F               | T                                  | PEKKIVMSYRTRIAKNSR          | VLDILV           | SQGERACR            | FFYPCLKQVEP       | N                | LYNRVKKYV       | SDVNESIGDAR          | 110             |          |     |           |         |   |     |      |     |     |      |    |      |     |
| White-throated sparrow    | -----MIRHSSSLFTNPYA     | IEVLR                    | T           | KKEELVQGIN    | D               | PEQLLHWLVENGI                      | F                           | T                | PEKKLVLSFYRTRTAKNSR | VLDILMSQGERACR    | FFYPCLKQVEP      | K               | LYSKIRKYVSEVNESIGDAR | 112             |          |     |           |         |   |     |      |     |     |      |    |      |     |
| Chicken                   | -----MHSTSLFTNPYA       | IEVLR                    | T           | KKEELIEGIN    | D               | PDHLLSCLIDNGI                      | F                           | A                | PEKRMVMSFYRTRTEK    | NARVLDTLISQGERACR | FFYPCLKQAE       | P               | KLYNKMRNYVSEVNESV    | RDSDR           | 110      |     |           |         |   |     |      |     |     |      |    |      |     |
| Turkey                    | -----MHSTSLFTNPYA       | IEVLR                    | T           | KKEELIEGIN    | D               | PDHLLSCLIDNDI                      | F                           | S                | PEKRMVMSFYRTRTEK    | NSRVDLILISQGERACR | FFYPCLKQVEP      | K               | LYNKMRKYVSEVNES      | IRDAR           | 110      |     |           |         |   |     |      |     |     |      |    |      |     |
| Budgerigar                | -----MHSTSLFTNPYA       | IEVLR                    | T           | KKEELIEGITH   | PDHLLNWLIDNGV   | F                                  | T                           | PEKKMVMSFYRTRTEK | NSRVDLLMSHGERACR    | FFYPCLKQVEP       | K                | LYSKIRKYVSEVNES | IGDAR                | 110             |          |     |           |         |   |     |      |     |     |      |    |      |     |
| Golden eagle              | -----MIMHSASLFTNPYA     | IEVLR                    | T           | KKEELVEG      | I               | KDPDRLLNWLIDNGI                    | F                           | T                | PEKKMVMSFYRTRTQKNSR | VLDLILISQGERACR   | FFYPCLKQVEP      | K               | LYSKIRKYVSEVNES      | IEDAR           | 112      |     |           |         |   |     |      |     |     |      |    |      |     |
| Barn owl                  | -----MIVHSVSLFTNPYA     | IEVLR                    | T           | KKEELVEG      | I               | N                                  | PDHLLNWLIDNGI               | F                | T                   | PEKKMVMSFYRTRTEK  | NSRVDLLISQGERACR | FFYPCLKQVEP     | K                    | LYSKMRKYVSEVNES | IRDAR    | 112 |           |         |   |     |      |     |     |      |    |      |     |
| Spotted gar               | -----MHSNRLFTNPYA       | IEVLQTKKRDIEG            | I           | S             | KT              | EHLLNLLIDKEVLP                     | PEKRLVLS                    | SCR              | S                   | REEKNSRVDL        | FLV              | SQGERACR        | FFYPCLK              | LIEP            | LYNSIKYV | VG  | DNESIGDGR | 110     |   |     |      |     |     |      |    |      |     |
| Asian bonytongue          | -----MHSAIFNPYA         | TEVHLK                   | K           | KDLIEG        | I               | S                                  | KTEYLLNLLIDKGV              | F                | P                   | PEKKALMSYDR       | TREEKNS          | E               | F                    | L               | V        | L   | SQGERACR  | FFYPCLK | L | VEP | DLYQ | SIR | TYV | GEIN | KV | RDAR | 109 |

\*\*\* : \* : \* : \* : \* : : : : : : : : : : : : : : : \* : \* \* \* \* : \* \* \* \* : \* \* \* : \* : . . . .



|                           |                                                             |                                                                     |     |
|---------------------------|-------------------------------------------------------------|---------------------------------------------------------------------|-----|
| Tasmanian devil           | ASKSPEINSLDEAIKILLTAGINAD--SSIVHNAFHDDQDVVIQQLLKYSAA-LPRE   | TRELALFEGIRKNLPEVVAALADGGTPLDVQNEHYTPTLLAAEMDRTLCAEVLIQRGSNMEA      | 452 |
| Gray short-tailed opossum | ASTFPPTNSLEEAIKILLTTGINAD--SGILHNAFHDDQVVIQQLLKHSI-LPSE     | TREALFEGIRKNLPRVVTALVDVGTNLNARDHNQYTPLLAAEMDRACANVILIRGANMMA        | 445 |
| Large yellow croaker      | ALFYAVSRNVKTVTIVLLNAGAKVD--YDVINEAIKNESILHLLLDNARGS----     | LRETFLFSAVQQNHGDGVAALIDSGADVNMDDKQGYTPLLLSAALGHAEEVFRVAVAKQALDA     | 462 |
| Nile tilapia              | ALFYAVKESNEKMTMTVLLNAGAKAD--YDVINEAINLHQESIQLQLLANARGVLSKDV | LSALFAAVRKNFDGAVSALIDSGADVNMDDGRRYTPLLLSAELGHSEVFSVLVAKNAKMDA       | 461 |
| Burton's mouthbrooder     | ALFYAVKESNEKMTMTVLLNAGAKAD--YDVIEAAILNHQESIQLQLLANARGVLSKDV | LSALFSAVVRMNFDDGAVSALIDSGADVNMDDGRRYTPLLLSAELGHSEVFSVLVAKNAKMDA     | 462 |
| Elephant shark            | PLFYAVSRGHINTAKVLLLEAGAQQVVDG                               | PLIDAAFSTGDQALIALMLTQARE----VGPATIFRAVERDLPKVVAALAEAGADVNSRDG       | 440 |
| Atlantic herring          | PLCYAVSRGNERTVAVLLQAGAQQVD--SDAMASAFDLNKSMSRLRLQLNAPQGM     | TAE SIHSALFRAVERN LGGIITALIDSGADVNTQNNQGYTPLLLAELGNVEAFKALVGKKANLEG | 450 |
| Zebrafish                 | ALHHAVRHGNEKTAAVLLKAGAQQVD--SRIVDAAFQLNRKSLLSLFLQHVHESMSQTE | INAALFKAVQRNLDVVAALIEHGADVNSCNE LGYTPVLLAELGNGEAFKVLVSKAKLDE        | 439 |
| Blind cave fish           | PLFYAISCGHEKTAAVLLQAGAQQVN--SAIIEAAFNLNRESVLSLLLRNINRMSQNEL | KTILFKAVKRNLDGVAALIEGTIDVNVRRD LGYTPLLLATELRNVEVFKMLVSEKAHLDK       | 444 |
| African coelacanth        | ALFHAVSHAFENTVKVLLLEADAYVN--SSIIDAAFNSNNQSFSLIMQYAKG-MSHAT  | MVSALFKAVQKNLYGI IASLIDKGIKVVNRNEMEFTPLLLAAEMGKTEAAKILIEKGAKLDE     | 450 |
| Western clawed frog       | ALLYAVSGGHLKTVKMLLEAGASID--SSIIDAAFATNNERIFGLLLEYSKG-LSPD   | TMSAVFKAVPLNLYGI INALIDKGTINATND IQYTPLLLAELGKTESAQAALIEKGAQLDV     | 467 |
| American chameleon        | ALGYAVSRGFKTKVLLLEAGAKVD--SSIIDVAFNSNNQSLFRLLLEYANK-MSPE    | TMSALFKAVEQNLHGIVAALIERGIDINAHNEMQYTPLLVACEMGKMAESAALIEKGA          | 437 |
| King cobra                | ALSYAASQGHKTKVLLLEGGAKVD--SSIIDAAFNSNHQSLFKLLLEYARG-LSS     | EAMVSALFKAVEKDLHGIVAALIERGTDINVRNEEQHTPLLVACKTGKIKSAKVLIEKGANLKD    | 445 |
| Common garter snake       | ALSYAVSQGHEKTKVLLLEGGAKVD--SSIEAAFNSNNQSLFKLLLEYARE-LSS     | SMVSFLFAKIEKDLHGIVAALIERGTDVNVNREEQYTPLLMACKTGKIKSAKVLIEKGANLKD     | 445 |
| Chinese alligator         | ALSYAVSRGFETTKVLLLEAGASID--SNVLDVAFDSDNNQSIQFILLYFKG-LSPD   | TMSALFKAVQKNLHGIVAALVDRGTDINVRNEMGYTPLLMACELGKTESAALIEKGA           | 449 |
| Western painted turtle    | ALGYAISQGFETTKVLLLEAGASID--SNIIDVAFNNRQSFIRLLEYSKG-LSPD     | MMVSALFKAVQKNLHGIVAALVDRGTDINAHNEMQYTPLLMACEMGKTETAEVLIKAGASLEE     | 451 |
| Green sea-turtle          | ALGYAISQGFETTKVLLLEAGASID--SNIIDVAFNNHQSIVRILLEYSKG-LSP     | EMVSALFKAVQKNLHGIVAALVDRGTDINAHNEMQSTPLLMACEMGKTETAEVLIKAGASLEE     | 451 |
| White-throated sparrow    | ALSYAVSQSENTAKVLLLEAGATVD--SNTVERAFNSNHPSIFKLLLEYSKD-LP     | ADIMELALFRAVQKNLHGIVAALIERGTDVNAHNKHYTPLLLACEMGKAESAALIEKGANLGI     | 450 |
| Chicken                   | ALSYTVHQGFENTAEVLLLEAGASVD--SNVVERAFNSNHPSIFKTLLEYSKD-LP    | SIMESALFKAVQKNLHGIVAALADRGTIDINAYNEMQYTPLLLACETGKAESAALIEKGANLGI    | 448 |
| Turkey                    | ALSYAVSQGFENTAKVLLLEAGASVD--SNVVEKAFNSNHPSIFKTLLEYSKD-LP    | ADIMESALFKAVQKNLHGIVAALADRGTIDVNAYNEQYTPLLLACEMGKAESAALIEKGANLGI    | 448 |
| Budgerigar                | PLSHAVSHGSENTAKVLLLEAGASVD--SNIETAFNSNHPSIFKLLLEYSKD-LP     | SDIMESALFRAVQKNLPGIVAALIERGTDIDALNHMRYTPLLLACETGKAESAALIEKGANLGI    | 448 |
| Golden eagle              | ALSYAVSQSENTAKVLLLEAGASVD--SNMAERAFNSNHPSIFKLLLEYSKD-L      | SSDIMESALFRAVQKNLHGIVAALIERGTDINAYNEMQYTPLLLACETGKAESAALIEKGA       | 450 |
| Barn owl                  | ALSYALSQSENTARVLLLEAGASVD--SNMAERAFNSKHPSIFKTLLEYSKD-L      | SPDIMESALFRAVQKNLHGIVAALIERGTDINAYNEMQYTPLLLACETGKAESAALIEKGANLGI   | 450 |
| Spotted gar               | ALFHAVHSGFEKTARVLLLEAGAKLD--SSIEAAFNLNSQSMYSLLLQHQAKG-L     | SPDIMESALFKAVQKNLQEVIAALIERGTDINARNGMQYTPLLLAELGNLEAVKILVAKASLDE    | 453 |
| Asian bonytongue          | SLFHAVNLRNENTARVLLLEAGAKVD--SDIMEAALNLDKSMFSLILNYAKE-L      | PPDAMKSLLFKAVQRNLEWIIAALIDAGTDVNSRNDLQYTPLLLAELGNVYAFNILMSKNASVED   | 456 |

: : \*\* : \* : : : : : \* : \* : : : \* : \* : : : \* : \* : : \* : \* : : \* : \* : : \* : \* : : \*

|                           |                                           |                                                             |                                                                      |     |
|---------------------------|-------------------------------------------|-------------------------------------------------------------|----------------------------------------------------------------------|-----|
| Tasmanian devil           | KTSYAESALHLAVKAGGIYTVLELLS GMSPNVQGFNGQTP | PLHVAAWYNKHEMVGLLVQAGAQNILSTE-QNTPLHIASEKGNVDAAIQLIQYKADPNL | KNKLNMTPLHLAAR-AGNKT                                                 | 570 |
| Gray short-tailed opossum | RTAHLDSALHLAVKAGAVYTVLELLDNGMSPNLAGWNGQTS | LHTAAWYNKHEMVNILLNAGANINALTTE-QNTPLHI                       | TSERGHVDTAIIQLIQQAADLNMKNKLSMTPLHLAAR-AGNMT                          | 563 |
| Large yellow croaker      | TLSDLSSALHLAVQSGSVSIQVTLLEKGMNDPNTGPKAQ   | TPHLFAAQCNREMPVDVLLRAGAKVNAVAQD-GLT                         | PLHIASQGHADSVTQLLQKADPSIKDRLGRTALHWAASSKGEGR                         | 581 |
| Nile tilapia              | TLSDLSSALHLAARSQSKPIVQTLLEKGLDPNIKAGKGT   | PLHLAAQCDRDPDITGLLLKGAQVNAVSD-GLI                           | PLHIASRQGHDTDTVIQLLHNKAEFGVKDRLGRTALHWAASSQVDSC                      | 580 |
| Burton's mouthbrooder     | TLSDLSSALHLAARSQSKPIVHTLLEKGLDPNIKAGKGT   | PLHLAAQCDGPDITGLLLKGAQVNAVVGQD-GLT                          | PLHIASMQGHTDTVIQLLHNKAEFGVTDRLGRTALHWAASSQVDSC                       | 581 |
| Elephant shark            | RAPDLSSALHLAVMSDPSLVHLLLEKGMNDPNTGAGE     | QTPHLHAARHRYKMDVLLIGAGSKPNSAAVL-GAT                         | PLHVASRWGSRQAERLIANKADINAKDRDARRPLHLAAL-VGDTF                        | 558 |
| Atlantic herring          | RLSNSTALHLAVQSGNVTITQVLEMGIEPNITGPRDQ     | TPLHMAAMHNQ SALVGLLLRAGAQNVAITQD-GHT                        | ALHLASQRGHSEVVTVLVRKADLSVRDKREGRALHWAASS-QGEAS                       | 568 |
| Zebrafish                 | RLPNQMSLHLAVQSGSIQIAQIILLHKGIDPNISGPK     | QDQTPHLHSASHNQPAMMALLRVGAQNPVITQD-GFT                       | PLHLASQNGHTEAVAQLEAKADVHAKDKQGRALHWAASS-QGEVA                        | 557 |
| Blind cave fish           | KLPNQTSALHLAIQSGSMQITQIILLNKGMNDPNTGPK    | QDQTPHLHSAALHNQPTLMLALLRKAQVDAVITQD-GLT                     | ALHLASQCGHTEAVAQLEKADVHAWDRQSRALHWAASS-QGEAG                         | 562 |
| African coelacanth        | RLPNQNTALHLVAQGGNLSVAKLLLEGNLNAVIVSG      | GDQTPLHVVAFHNKPAVADILIRAGAKVNAVITKE-SSV                     | TPLHIASQRGFSFAAQCLIQHRANVAKDKHKSPTPLHFAAA-VGDYP                      | 569 |
| Western clawed frog       | RTPNMSTALHLAVQGGDASITKLLIRKGININIA        | GPQDQTPLHVAAFHNKQELADVLIAGANVNVITKE-LFT                     | PLHIASQRGNLHVQSLHLLHKNVNAKDKQSRTPHLHFAAA-GGAYE                       | 585 |
| American chameleon        | KTPDSSALHLAVQAGSTSIKMLLHKGMNDPNTGQD       | QSPHLVAAFHNKALVVDVLEGGAKIDPVTKE-LHT                         | PLHLASQYGHTEVAQKLLQNKAKVNLKDKQSKTPHLHFAAA-KGHIA                      | 555 |
| King cobra                | KAPNLSPLHLAVEAGAFSIAQMLLQKGDIPNITAQ       | GNQTPLHVAAIYNRGA                                            | VLLIEGGAKIDAVTITD-LFTPLHMASDKGHTDVALKLLQHKANVHLKNKRSKTPHLHFAAA-MGNPA | 563 |
| Common garter snake       | KAPNLSPLHLVVEAGAFSIAQMLLQKGDIPNITAQ       | GNQTPLHVAAIYNRGA                                            | VLLIEGGAKIDAVTITD-LFTPLHLASEKGHTDVALKLLQHKANVHLKNKRSKTPHLHFAAA-MGNPA | 563 |
| Chinese alligator         | KTPSSDTALHLAVQAGAVAITSLLRKGMNDPNTGQ       | DQTPLHIAAALRNHGALVLLINAGAKINAVITKE-LVT                      | PLHVASQRGNADVAQKLLQHKANVNVKDKQSKTPHLHFAAA-LGDCA                      | 567 |
| Western painted turtle    | KMPNSNTVHLAVQAGAVSITNLLLRKGMNDPNTS        | QGEQTPLHVAAFHNKGSIVDILINAGAKINAVITKE-LVT                    | PLHVASQRGNVDVAQKLLHKNANVNVKDKQSKTPHLHFAAA-KGDHA                      | 569 |
| Green sea-turtle          | KMPNSNTVHLAVQAGAVSITNLLLRKGMNDPNTS        | QGEQTPLHVAAFHNKGSIVDILINAGAKINAVITKE-LVT                    | PLHVASQRGNVDVAQKLLHKNANVNVKDKQSKTPHLHFAAA-KGDHA                      | 569 |
| White-throated sparrow    | RTPASDTALHLAVQAGAASTALHLLKGMNDPNTG        | AEQTPLHVAAALRNHGALVLLINAGAKINAVITKE-FVT                     | PLHIASHRGHADAARQLLHKKAVPNAQDKQSKTPHLHFAAA-QGHRT                      | 568 |
| Chicken                   | KTPASDTALHLAVQAGAASTNLLLHKGMNDPNTG        | ADEQTPLHIAALHNSGALVGLLVSAKAKINAVITKE-FVT                    | PLHVASQRGNADVALQKLLHKNANVNAKDKQSKTPHLHFAAA-RGDKT                     | 566 |
| Turkey                    | KTPASDTALHLAVRAGAASITNLLLHKGMNDPNTG       | DEQTPLHIAALHNSGALVGLLVSAKAKINAVITKE-FVT                     | PLHVASQRGNADVALQKLLHKNANVNAKDKQSKTPHLHFAAA-RGDKT                     | 566 |
| Budgerigar                | RTPASDTALHLAVQAGAASTALHLLKGMNDPNTG        | AEQTPLHVAAALRNHGALVLLINAGAKINAVITKE-FVT                     | PLHIASHRGHADAARQLLHKKAVPNAQDKQSKTPHLHFAAA-RGDRT                      | 566 |
| Golden eagle              | KTPASDTALHLAVQAGAASTANLLLHKGMNDPNTG       | ADEQTPLHIAALHNSGALVGLLVSAKAKINAVITKE-FVT                    | PLHIASHRGHADAARQLLHKKAVPNAQDKQSKTPHLHFAAA-RGDKA                      | 568 |
| Barn owl                  | KTPASDTALHLAVRAGAASITNLLLHKGMNDPNTG       | AEQTPLHVAAALRNHGALVGLLVSAKAKINAVITKE-FVT                    | PLHIASHRGHADAARQLLHKKAVPNAQDKQSKTPHLHFAAA-RGDKA                      | 568 |
| Spotted gar               | KLPNHNSALHLAAQSGNLPVLLKLLKGMNDPNTG        | PVQDQTPLHLAALHNSKPDVVEVLIIRHGAQVNAVITKE-VLT                 | PLHIASQGHQEVVEKLIQFKADINAKDKQSRTPHLHFAAA-QGGAS                       | 571 |
| Asian bonytongue          | KLPNGNSSLHLAVQSGNMHITKLLLEEGVDANAVGS      | QEQTPLHLTALYNQ SALVEELLHVGAHINAVDQK-GLT                     | PLHVASQGHFDIVSLLIRREADISAKDKQARTALHWAASS-QPQAT                       | 574 |

: \*\* : . : \* : \* : \* : : : \* : \* : : : \* : \* : : \* : \* : : \* : \* : : \* : \* : : \*

|                           |                                                                                                                           |     |
|---------------------------|---------------------------------------------------------------------------------------------------------------------------|-----|
| Tasmanian devil           | MVELLIHSGSDPNTADKEKKTPLHWASSEGHLVVKT-MLIHKVRFGAKDMGGFSPHYAALKGNVEMVKLFLEAGKKNKINERNIYRKTPLHLAAEQGHGDLIKLLLSCGAAVNALDNN    | 689 |
| Gray short-tailed opossum | MVELLLHSGADPNVPDRKKTALHWAASAFIKVVY-LNLYKARSGRTRMDGYSPLHYAALKGNVEMVKLFLEAGKKNKINERNIYRKTPLHLAVEQGHGTELIKMLINNGAAVNALDNN    | 682 |
| Large yellow croaker      | VVDLLLSAKANPNA TDNEKKVALHLAAEGKVDDVTS-LMSHKAAGKAGKMDGGSTPLHYAAGGHANVVSALLRLNNKGVDERNTWRKTPLHAAAEKGHDSVVVLLLEAGAKINNFDQG   | 700 |
| Nile tilapia              | VVDLLLSAKADPDATDNEKKTPLHLAAEMEGKVDMAIS-LLSHRAKRRARDMDGSTPLHYAAGGHVSVVTTALLQPLNNKGTEDRNAWRKTPLHTAAEKGHDSVALQLLEAGAKINATDHN | 699 |
| Burton's mouthbrooder     | VVDLLLSAKADPDATDNEKKTPLHLAAEMEGKVDAIS-LLSHRAKRRARDMDGSTPLHYAAGGHVSVVTTALLQPLNNKGTEDRNAWRKTPLHAAAEKGHDSVALRLEAGAKINATDHN   | 700 |
| Elephant shark            | MADLLSNHADANPLDKEKKTPLHLAAESEGHDFVSL-MLIRKKGFGAKMDGNTPLMYYAASKGHTSVVKAFLLAGRNHNVDKKNVWRRTALHLAAEHGSEDVLELLMSGGAI DALDNA   | 677 |
| Atlantic herring          | VIKLLLSAGADVSA TEKEKKTPLHMAAMEGKAEAVSSLLQKAKVEAKMDGCTSLHYAAANGHIEAATALLSSGKIKSVDDHKNTWRRTPLHAAEQQEALVELLLSAGAKINATDSN     | 688 |
| Zebrafish                 | TIQSLLAAGAYSNA SEREKKTPLHLAAEAGHTKAVSA-LLAGKAKVGA KMDGCSPLHYAARNKERAGSVLLASSKSNVDDKNVWRRTALHLAAEHGHEALVGILLENKAKINALDNN   | 676 |
| Blind cave fish           | VIKLLLYAGADANAATKEKKTPLHLAATAGHAEATST-LLAGKANGAAKMDGCSALHYAAGNGHESVAATLLTSGKNKNVDDRNVWRRTPLHLAAEHGQDILVDLLEKQAKINAMDNN    | 681 |
| African coelacanth        | MVELLLNNADPNSTDEKKTSLHVAEEGHSVVEL-MLAKKAKFGAKMDGCTPMHYASIQGNTVEVVKALLAAGKKNVDDKNVWRKTSLHLAAECGHNDMAELLSSGASLNSLDNN        | 688 |
| Western clawed frog       | LVQLLNNKADPNSTTEKDKTPLHIAAAGHIEIVNV-MLKGRARCAVKMDGCTPMHYAAATGSSEITAKALLKAGKKNVDEKNVWRKTPLHLAAEHGHSDLINLLQNGAAINALDNN      | 704 |
| American chameleon        | LVELLLGSNADPNSTADKEKKTPLHLASIGSHLSTIKA-LLAKSRFVGA KMDGCTPMHYAASIGNMEILKALLVAGNYKNINDKNIWRKTPLHLTAEYGHSDMMHYLLSNGSAINALDNN | 674 |
| King cobra                | MVELLLNFKADPNATDKEKKSPLHSATLGGHFYAVKA-LLAKSRVASKMDGCTPMHYAASIGNMEILKELLVAGDNKNINDKNIWRKTLLHLAAEHGQSNLIDFLLSNGSAINALDNN    | 682 |
| Common garter snake       | MVEMLLNFKADPNATDKEKKTPLHFATLGGHFYAVKA-LLAKSRVASKMDGCTPMHYAASIGNMEILKELLVAGNYKNINDKNIWRKTLLHLAAEHGHSNLDIFLLSNGSAINALDNN    | 682 |
| Chinese alligator         | MVELLINSNADPNVTDREKKTPLHAAALRGHLSIVEL-LLAKKARFVGA KMDGCTPMHYAASIGNMEILKALLVAGNYKNINDKNIWRKTPLHLTAEYGHSDMMHYLLSNGSAINALDNN | 686 |
| Western painted turtle    | MVELLLSFNADPNAMDKKKTPLHTAAMGGHLNTVKV-LLAQKARFVGA KMDGCTPMHYAASIGNMEILKELLVAGNYKNINDKNIWRKTPLHLAAEHGHSNLDIFLLSNGSAINALDNN  | 688 |
| Green sea-turtle          | MVELLLSFNADPNAMDKKKTPLHTAAMGGHFNVTVKV-LLAQKARFVGA KMDGCTPMHYAASIGNMEILKELLVAGNYKNINDKNIWRKTPLHLAAEHGHSNLDIFLLSNGSAINALDNN | 688 |
| White-throated sparrow    | LAEMLLKARADPNADKEKKTPLHAAALRGHLSIVEL-LLAKKGRVGA KMDGCTPMHYAASIGNMEILKALLVAGNYKNINDKNIWRKTPLHLTAEYGHSDMMHYLLSNGSAINALDNN   | 687 |
| Chicken                   | MVEMLLNANADPNADKEKKTPLHAAALRGHLSIVQV-LLAKKGRVGA KMDGCTPMHYAASIGNMEILKELLVAGNYKNINDKNIWRKTALHIAAEYGHSDLINLLLYGAAINALDNN    | 685 |
| Turkey                    | MVEMLLNANADPNADKEKKTPLHAAALRGHLGIQVQ-LLAKKGRVGA KMDGCTPMHYAASIGNMEILKELLVAGNYKNINDKNIWRKTALHIAAEYGHSDLINLLLYGAAINALDNN    | 685 |
| Budgerigar                | VVEMLLNADPNADKEKKTPLHTAARVGHLSIVEV-LLAGKARFVGA KMDGCTPMHYAASIGNMEILKELLVAGNYKNINDKNIWRKTALHIAAEYGHSDLINLLLYGAAINALDNN     | 685 |
| Golden eagle              | MVEMLLNANADPNADKEKKTPLHTAARVGHLSIVKV-LLANKGRVGA KMDGCTPMHYAASIGNMEILKELLVAGNYKNINDKNIWRKTALHIAAEYGHSDLINLLLYGAAINALDNN    | 687 |
| Barn owl                  | MVEMLLNANADPNADKEKKTPLHIAAMRGHLSIVKA-LLAEKGRVGA KMDGCTPMHYAASIGNMEILKELLVAGNYKNINDKNIWRKTALHIAAEYGHSDLINLLLYGAAINALDNN    | 687 |
| Spotted gar               | VVQLLLRNGADPNADVDEKKSPLHMAALRGHLSIVEL-LLAGKARFVGA KMDGCTPMHYAASIGNMEILKELLVAGNYKNINDKNIWRKTALHIAAEYGHSDLINLLLYGAAINALDNN  | 690 |
| Asian bonytongue          | VARLLSSTGADANAVDKEKKTPLHFAAMGGHGEVASV-LLARKASFRAKMDGCTPLHYAAGGHLDVAVLLSTGK-KSVNDKNVWRKTALHLASEHGQDSLIDLLMCSGANVNALDNN     | 692 |

: \* : . : \*\* \* \* : : : : : \* \* \* \* : \* : \* : : : \* : : \* : : \* : : \* : : \*

|                           |                                                                                       |     |
|---------------------------|---------------------------------------------------------------------------------------|-----|
| Tasmanian devil           | RDTPLHCACKTGHWSVTSMINYSQG-----EKFDLQAVNSLGKTPLOVAEGTVIENQEQIVTLLKKKMF LTR             | 757 |
| Gray short-tailed opossum | RDTPLHCACKTGHWSVTSLINCQSQR-----EKFDLQASNSLGKTPLOVAEGSATQSQEQIVTLLRRKMF LTR            | 750 |
| Large yellow croaker      | KDTPLHCAARGGHQEVVKRLVNWGGHGMGRQKKANLQATNNVDKTPLOVAESGDTPOHEEIVTLLMRKMF L I K          | 774 |
| Nile tilapia              | KDTPLHCAARGGHKVMKILVNWQAGHVGRNKKANLQAKNIGKTPLOVAESKHTPERENTAILLRKMF L M K             | 773 |
| Burton's mouthbrooder     | KDTPLHCAARGGHKVMKILVNWQAGNVGWRNKANLQAKNIGKTPLOVAETKHTPEHENTAILLRKMF L M K             | 774 |
| Elephant shark            | KDTPLHCACRSGNVGAHRLANWAG-----QAKAFHVTTNNVRKTPLOVASESGSDSGHRQIVVLLRRKMM LTR            | 745 |
| Atlantic herring          | KDTPLHCACRTGHLGIVQRLVNWVHK-----EKANLQAINNVKTPLOVAEAGDTLNHTHIVTLLKKKMF L M K           | 756 |
| Zebrafish                 | KDTPLHCACKTGHVLTQVRLNVTNG-----ERANLQATNNVKNALQVAEAGDTEAHENISTLLKKKMF L V K            | 744 |
| Blind cave fish           | KDTPLHSACRGGHVDTVQRLVNWVQ-----QRANLHATNNVKTAVQVAESEDSPNHQS IATLLKKKMF I I K           | 749 |
| African coelacanth        | RDTPLHSACRAGDLPTVQMLVNWVQ-----KKGILQARNRSRKIPLEVAQSEGTHHHS I I TFLKKKML L I K         | 756 |
| Western clawed frog       | RDTPLHCACKAGHLSVQTLVSVWQ-----EKANLQATNGLKTPLOVAESSSSDAHQH IATLLKKKML I I R            | 772 |
| American chameleon        | KDTPLHCACKAGHFNVTNLVNSWAG-----EKVNLQATNSLKKTPLOVAESSSTDQQAQIVTLLKKKML L I R           | 742 |
| King cobra                | KDTPLHCACKAGHFDVSRALLNWSAG-----DKANLQAANSLKTPLOVAESSVTEHQAQIVNLLKKKML L I R           | 750 |
| Common garter snake       | KDTPLHCACKAGHFDVSRALLNWSAG-----DKANLQATNSLKKTPLOVAESSVTDQQAQIVNLLKKKML L I K          | 750 |
| Chinese alligator         | KDTPLHCACKAGHFNVSLSVWSQ-----ERANLQATNSLRKTPLOVAEFNTTENQAQIVTFLKKKMF I T K             | 754 |
| Western painted turtle    | KDTPLHCACKAGHFNVSLSVWSQ-----EKANLQATNSLKKTPLOVAEFSTSDNQQAQIVTLLKKKML I R -            | 755 |
| Green sea-turtle          | KDTPLHCACKAGHFNVSLSVWSQ-----EKANLQATNSLKKTPLOVAEFSTSDNQQAQIVTLLKKKML I R -            | 755 |
| White-throated sparrow    | RDTALHCACRAGHLSAVSALLSWARG-----EKANVLAVNSLRKTPLOVAEFHKTENQAQ I I TLLRRKML I A K       | 755 |
| Chicken                   | KDTPLHCACKAGHLNVAANSLNWSQ-----EKANLVAANSLKTPLOVAECNKTENQAQ I V TLLKKKML M T K         | 753 |
| Turkey                    | KDTPLHCACKAGHLNVAANSLNWSQ-----EKANLVAANSLKTPLOVAECNKTENQAQ I V NLLKKKML M A K         | 753 |
| Budgerigar                | RDTALHCACKAGHLNVAANSLNWSQ-----QRANLLAANSLQKTPLOVAEFNI TENQAQ I V TLLKKKML I T K       | 753 |
| Golden eagle              | KDTPLHCACKAGHFNAANSLNWSQ-----EKANLVAANSLKTPLOVAEFNKAENQAQ I V KLLKKKML I T K          | 755 |
| Barn owl                  | KDTPLHCACRAGHFNAANSLNWSQ-----EKANLVAANSLKTPLOVAEFNKTENQAQ I V TLLKKKML I T K          | 755 |
| Spotted gar               | KDTPLHIASRAGHLGTVHRLVNWVQ-----EKVNLQATNSVKKTPLOVAQGTGDTEKHQQAQ I V TLLKKKMF L I K     | 758 |
| Asian bonytongue          | KDTPLHCATRFGHLESVQRLLSWTGG-----TGANLRAKNNVDKTPLOVAQCHHTANHQ I A S L L Q K K M L L I K | 760 |

: \*\* \* \* : \* . : : . . \* \* \* : : : : : \* : \* : \* : \*

**Figure S1. Sequence alignment of Caiap gene in different species.** (A) Diagram showing the exons/introns organization of zebrafish caiap gene, indicating the position where the Caiap MO and gRNA bind. (B) Multiple alignment of zebrafish Caiap sequence with other identified Caiap sequences. The predicted CARD sequences are black boxed and yellow boxed indicate the ANK domains. (\*) Identity in one position; (:) conservative substitutions in one position; (.) semiconservative substitutions in one position. The accession numbers for Caiap sequences are XP\_685576 for zebrafish (*Danio rerio*), XP\_007259539 for blind cave fish (*Astyanax fasciatus mexicanus*), XP\_012694853 for atlantic herring (*Clupea harengus*), XP\_006635081 for spotted gar (*Lepisosteus oculatus*), KPP59498 for Asian bonytongue (*Scleropages formosus*), KKF28470 for large yellow croaker (*Pseudosciaena crocea*), XP\_006002757 for African coelacanth (*Latimeria chalumnae*), XP\_005479286 for Nile tilapia (*Oreochromis niloticus*), XP\_007901907 for elephant shark (*Callorhinchus milii*), XP\_014189326 for Burton's mouthbrooder (*Haplochromis burtoni*), XP\_008107583 for American chameleon (*Anolis carolinensis*), XP\_013917140 for common garter snake (*Thamnophis sirtalis*), XP\_006025802 for Chinese alligator (*Alligator sinensis*), XP\_005284853 for western painted turtle (*Chrysemys picta bellii*), ETE70266 for king cobra (*Ophiophagus hannah*), XP\_007059125 for green sea-turtle (*Chelonia mydas*), XP\_010714589 for turkey (*Meleagris gallopavo*), XP\_004936902 for chicken (*Gallus gallus*), XP\_005151355 for budgerigar (*Melopsittacus undulatus*), XP\_011570978 for golden eagle (*Aquila chrysaetos canadensis*), XP\_009961493 for barn owl (*Tyto alba*), XP\_005482422 for white-throated sparrow (*Zonotrichia albicollis*), XP\_002931656 for western clawed frog (*Xenopus tropicalis*), XP\_003767351 for Tasmanian devil (*Sarcophilus harrisii*), and XP\_007480566 for gray short-tailed opossum (*Monodelphis domestica*).
