# Supplementary material for: Identification of an Evolutionarily Conserved Ankyrin Domain-Containing Protein, Caiap, Which Regulates Inflammasome-Dependent Resistance to Bacterial Infection
Source: PubMed Central journal article supplement (PMC5662874; doi:10.3389/fimmu.2017.01375), 2017-10-19
Supplement: table_1.pdf [file table_1.pdf]

**Table S1.** Morpholinos used in this study. The gene symbols followed the Zebrafish Nomenclature Guidelines ([http://zfin.org/zf\\_info/nomen.html](http://zfin.org/zf_info/nomen.html)). ENA, European Nucleotide Archive (<http://www.ebi.ac.uk/ena/>).

| Gene                            | ENA or Ensembl ID  | Target    | Sequence (5'→3')          | Concentration (mM) | Reference                      |
|---------------------------------|--------------------|-----------|---------------------------|--------------------|--------------------------------|
| <i>caiap</i>                    | ENSDARG00000092758 | atg/5'UTR | CTGGTTGAGCCCATGTCCAGTGCTT | 0.16               | This work                      |
| <i>asc</i><br>( <i>pycard</i> ) | ENSDARG00000040076 | atg/5'UTR | GCTGCTCCTTGAAAGATTCCGCCAT | 0.6                | Tyrkalska <i>et al.</i> , 2016 |
