# Supplementary material for: Identification of an Evolutionarily Conserved Ankyrin Domain-Containing Protein, Caiap, Which Regulates Inflammasome-Dependent Resistance to Bacterial Infection
Source: PubMed Central journal article supplement (PMC5662874; doi:10.3389/fimmu.2017.01375), 2017-10-19
Supplement: table_2.pdf [file table_2.pdf]

**Table S2.** Primers used in this study. The gene symbols followed the Zebrafish Nomenclature Guidelines ([http://zfin.org/zf\\_info/nomen.html](http://zfin.org/zf_info/nomen.html)). ENA, European Nucleotide Archive (<http://www.ebi.ac.uk/ena/>).

| Gene         | ENA ID       | Name | Sequence (5'→3')          | Use     |                    |
|--------------|--------------|------|---------------------------|---------|--------------------|
| <i>rps11</i> | NM_213377    | F1   | GGCGTCAACGTGTCAGAGTA      | RT-qPCR |                    |
|              |              | R1   | GCCTCTTCTCAAAACGGTTG      |         |                    |
| <i>caiap</i> | NM_001025492 | F2   | AGCGCAGATATTGTTGCATAAGGGC |         |                    |
|              |              | R2   | GCCCCACACGCAGTAGCAG       |         |                    |
| <i>gfp</i>   | EF591450     | F5   | ACGTAAACGGCCACAAGTTC      |         |                    |
|              |              | R5   | AAGTCGTGCTGCTTCATGTG      |         |                    |
| <i>il1b</i>  | NM_212844    | F5   | GGCTGTGTGTTTGGGAATCT      |         |                    |
|              |              | R5   | TGATAAACCAACCGGGACA       |         |                    |
| <i>caiap</i> | NM_001025492 | F    | AGGCCATTGTGTATTTTCTGCT    |         | Validation of gRNA |
|              |              | R    | AAGCTCATTGCAGCTATTGACA    |         |                    |
